# Supplementary material for: Facile orientation control of MOF-303 hollow fiber membranes by a dual-source seeding method
Source: PubMed Central journal article supplement (PMC11599905; doi:10.1038/s41467-024-54730-z), 2024-11-26
Supplement: 41467_2024_54730_MOESM3_ESM.pdf [file 41467_2024_54730_MOESM3_ESM.pdf]

## **Description of Additional Supplementary Files**

### **File Name: Supplementary Movie 1**

**Description:** Water contact on the MOF-303 membrane.

### **File Name: Supplementary Movie 2**

**Description:** Ethanol contact on the MOF-303 membrane.
